# Supplementary material for: Sterilization of hydrogen peroxide resistant bacterial spores with stabilized chlorine dioxide
Source: PubMed Central journal article supplement (PMC4398677; doi:10.1186/s13568-015-0109-4), 2015-04-17
Supplement: 13568_2015_109_MOESM1_ESM.pdf [file 13568_2015_109_MOESM1_ESM.pdf]

## Supplementary Information for the AMB Express Manuscript:

### **Sterilization of Hydrogen Peroxide Resistant Bacterial Spores with Stabilized Chlorine Dioxide**

Anthony Friedline<sup>1</sup>, Malcolm Zachariah<sup>1</sup>, Amy Middaugh<sup>1</sup>, Preston Larson<sup>2</sup>, Greg Strout<sup>2</sup>, Matt Heiser<sup>3</sup>, Neeraj Khanna<sup>3</sup>, Parag Vaishampayan<sup>4</sup>, and Charles V. Rice<sup>1#</sup>

<sup>1</sup> Department of Chemistry and Biochemistry, Stephenson Life Sciences Research Center, University of Oklahoma, Norman, Oklahoma, USA; <sup>2</sup> Samuel Roberts Noble Microscopy Laboratory, George Lynn Cross Hall, University of Oklahoma, Norman, Oklahoma, USA; <sup>3</sup> Bio-Cide International, Inc., Norman, Oklahoma, USA; <sup>4</sup> Jet Propulsion Laboratory, California Institute of Technology, Biotechnology and Planetary Protection Group, Pasadena, California, USA

# Address correspondence to Prof. Charles V. Rice, [rice@ou.edu](mailto:rice@ou.edu).

Running headline: Spore killing by chlorine dioxide

**TABLE S1** Plate counting of *B. pumilus* SAFR-032 spores, one-hour exposure time

|                |   | CFU (by serial dilution) <sup>†</sup> |                  |                  |                  |                  |                  |
|----------------|---|---------------------------------------|------------------|------------------|------------------|------------------|------------------|
|                |   | 10 <sup>-1</sup>                      | 10 <sup>-2</sup> | 10 <sup>-3</sup> | 10 <sup>-4</sup> | 10 <sup>-5</sup> | 10 <sup>-6</sup> |
| Control        | A | TNTC                                  | TNTC             | TNTC             | TNTC             | 79               | 8                |
|                | B | TNTC                                  | TNTC             | TNTC             | TNTC             | 109*             | 5                |
| Peroxide, 3.5% | A | TNTC                                  | TNTC             | TNTC             | 181              | 6                | 2                |
|                | B | TNTC                                  | TNTC             | TNTC             | 113              | 5                | 2                |
| Inactive Oxine | A | TNTC                                  | TNTC             | TNTC             | 298              | 27               | 7                |
|                | B | TNTC                                  | TNTC             | TNTC             | 260              | 16               | 0                |
| Active Oxine   | A | 201                                   | 14               | 0                | 0                | 1                | 0                |
|                | B | TNTC                                  | 18               | 1                | 1                | 0                | 0*               |

Table S1. Plate counting of post-Oxine®-exposure *B. pumilus* SAFR-032 spores exposed on aluminum coupons using serial dilutions, on TSA plates. Exposure time to Oxine® was 1h; results shown are at 24h incubation time. Inactivated Oxine® concentration = 108.5 ppm ClO<sub>2</sub>. Activated Oxine® concentration = 70.4 ppm total ClO<sub>2</sub>, 39 ppm free ClO<sub>2</sub>. A and B are duplicate platings. TNTC = too numerous to count (>300 colonies total or >100 colonies in one quarter of plate). \* = plate appeared damaged or contaminated. † = '10<sup>-1</sup>' represents plating of spores directly after ultrasonication (into 10 mL sodium thiosulfate, effective dilution 100:1); remaining dilutions are 10:1 dilutions into PBS.

**TABLE S2** Plate counting of *B. pumilus* SAFR-032 spores, 24-hour exposure time

|                |   | CFU (by serial dilution) † |                  |                  |                  |                  |                  |
|----------------|---|----------------------------|------------------|------------------|------------------|------------------|------------------|
|                |   | 10 <sup>-1</sup>           | 10 <sup>-2</sup> | 10 <sup>-3</sup> | 10 <sup>-4</sup> | 10 <sup>-5</sup> | 10 <sup>-6</sup> |
| Control        | A | TNTC                       | TNTC             | TNTC             | TNTC             | 31               | 2*               |
|                | B | TNTC                       | TNTC             | TNTC             | TNTC             | 20               | 2                |
| Peroxide, 3.5% | A | 0                          | 0                | 0                | 0                | 0                | 0                |
|                | B | 1                          | 0                | 0                | 0                | 0                | 0                |
| Inactive Oxine | A | TNTC                       | TNTC             | TNTC             | TNTC             | 48*              | 8                |
|                | B | TNTC                       | TNTC             | TNTC             | TNTC             | 78               | 3                |
| Active Oxine   | A | 3                          | 0                | 0                | 0                | 0                | 0                |
|                | B | 3                          | 0                | 0                | 0                | 0                | 0                |

Table S2. Plate counting of post-Oxine®-exposure *B. pumilus* SAFR-032 spores via serial dilution onto TSA plates. Oxine® concentrations are equal to those in Table S1. Exposure time was 24h with counting after 24h incubation. TNTC = too numerous to count (>300 colonies per plate or >100 colonies in one quarter of plate). \* = agar plate appeared damaged or contaminated. † = '10<sup>-1</sup>' represents plating of spores directly after ultrasonication (into 10 mL sodium thiosulfate, effective dilution 100:1); remaining dilutions are 10:1 dilutions into PBS.
